# Supplementary material
Source: PubMed Central journal article supplement (PMC4198103)
Supplement: bc500312w_si_001.pdf [file bc500312w_si_001.pdf]

## Supporting Information

### ***In vitro & In vivo* Analysis of Indocyanine Green-Labeled Panitumumab for Optical Imaging – A Cautionary Tale**

Yang Zhou, Young-Seung Kim, Diane E. Milenic, Kwamena E. Baidoo and Martin W. Brechbiel\*

Radioimmune & Inorganic Chemistry Section, Radiation Oncology Branch, National Cancer Institute, 10 Center Drive, Bethesda, MD 20892

---

\*To whom correspondence should be addressed: Martin W. Brechbiel, Radioimmune & Inorganic Chemistry Section, Radiation Oncology Branch, NCI, NIH, 10 Center Drive, Building 10, Rm B3B69, Bethesda, Maryland 20892-1002, USA. Phone: 301-496-0591; Fax 301-402-1923; Email: [martinwb@mail.nih.gov](mailto:martinwb@mail.nih.gov)

## Table of Contents

|                                                                                                                                                               |     |
|---------------------------------------------------------------------------------------------------------------------------------------------------------------|-----|
| Experimental Procedures .....                                                                                                                                 | S3  |
| Figure S1. RP-HPLC profile of ICG-sulfo-OSu .....                                                                                                             | S5  |
| Figure S2. SE-HPLC data of ICG-sOSu-HuM195 .....                                                                                                              | S6  |
| Figure S3. <i>in vitro</i> fluorescence microscopy images .....                                                                                               | S7  |
| Figure S4. <i>ex vivo</i> NIR fluorescence image of the dissected organs from athymic mice bearing<br>HER1-positive peritoneal LS-174T tumor xenografts ..... | S8  |
| Figure S5. SE-HPLC profile of the doubly-purified ICG-sOSu-panitumumab .....                                                                                  | S9  |
| References .....                                                                                                                                              | S10 |

## Experimental Procedures

**Reverse-phase HPLC (RP-HPLC).** ICG-sulfo-OSu was analyzed by using a Beckman system Gold HPLC (Fullerton, CA) equipped with 126 solvent module and 168 UV detector ( $\lambda = 254$  nm) controlled by 32 Karat software and Grace Vydac C<sub>18</sub> semi-prep column (10 x 250 mm, 300 Å pore size). The flow rate was 2.5 mL/min, and the gradient mobile phase was isocratic with 90 % A (0.1 % TFA in H<sub>2</sub>O) and 10 % B (0.1 % TFA in acetonitrile) at 0 – 5 min, followed by a gradient mobile phase going from 10 % B at 5 min to 100 % B at 15 min. The mobile phase was then isocratic with 100 % B at 15 – 25 min.

**Fluorescence microscopy.** HER1-positive A431 cells ( $2.5 \times 10^4$ /well, American Type Culture Collection (ATCC), Rockville, MD) were cultured in 8-well chamber slides for 72 h in Dulbecco's Modified Eagle's Medium (DMEM) containing 10% FetalPLEX (Gemini Bio-Products, West Sacramento, CA), and 10 mM glutamine solution in a humidified atmosphere of 5% CO<sub>2</sub> at 37 °C. Thereafter, cells were treated with 2 µg of the HPLC-purified ICG-sOSu-panitumumab conjugates (**1**, **2**, and **3**) in 400 µL culture media, and incubated for another 24 h. ICG-sOSu-HuM195 was used as a negative control. Cells were then fixed with 4% formalin in PBS for 10 min. at room temperature. Fluorescence microscopy was performed using a Zeiss AxioObserver Z1 microscope (Carl Zeiss Microscopy, Thornwood, NY) equipped with a 63x Plan-apochromat (N.A. 1.4) oil immersion lens and the following filter set: excitation ET710/75x, dichroic T760lpxr, and emission ET810/90m (Chroma Technology Corp., Bellows Falls, VT). Images were acquired using an Axiocam MRm CCD camera operated in NIR sensitivity mode with a Zeiss Zen software. Differential interference contrast (DIC) images were also captured.

**Animal model used in Figure S4.** Metastatic peritoneal LS-174T colorectal cancer model was established by intraperitoneal (i.p.) injection of  $1 \times 10^8$  LS-174T cells in 1 mL of the media as previously described.<sup>1</sup>

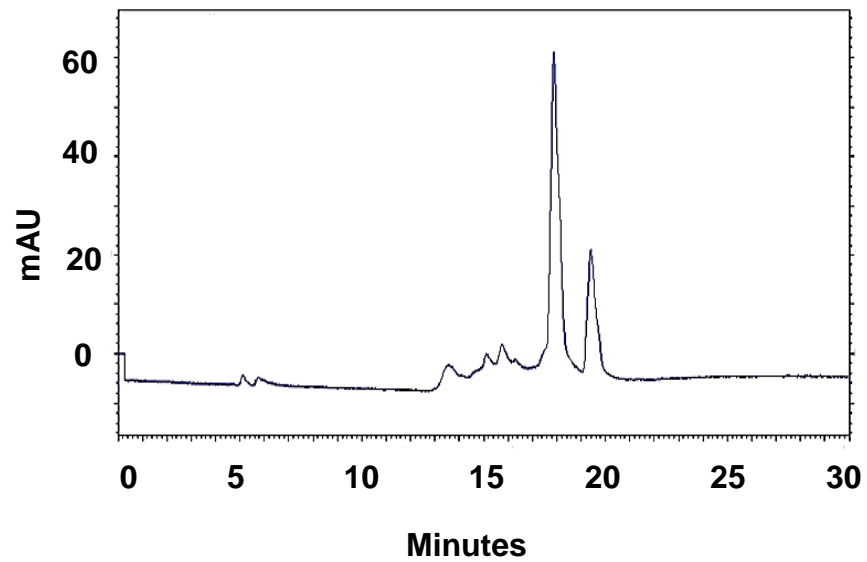

**Figure S1.** RP-HPLC profile of ICG-sulfo-OSu dissolved in DMSO.

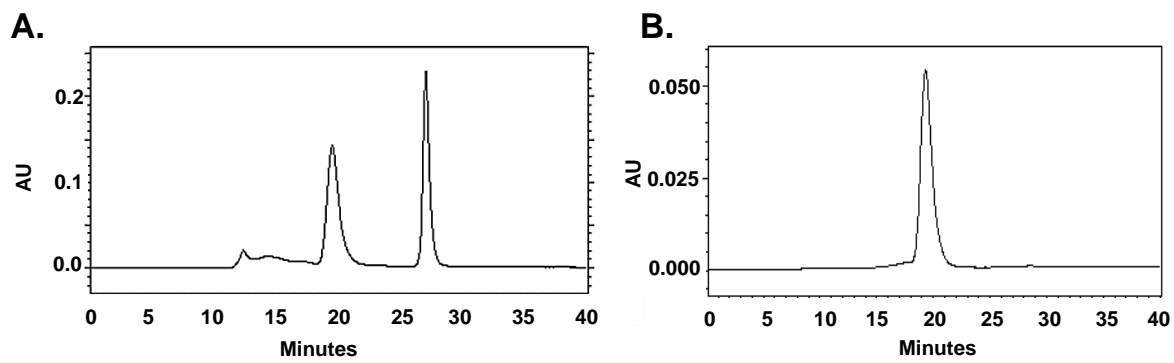

**Figure S2.** **A.** SE-HPLC profile of ICG-sOSu-HuM195 conjugation reaction mixture (**10** $\times$ ). **B.** SE-HPLC profile of SE-HPLC-purified ICG-sOSu-HuM195 (**10** $\times$ ).

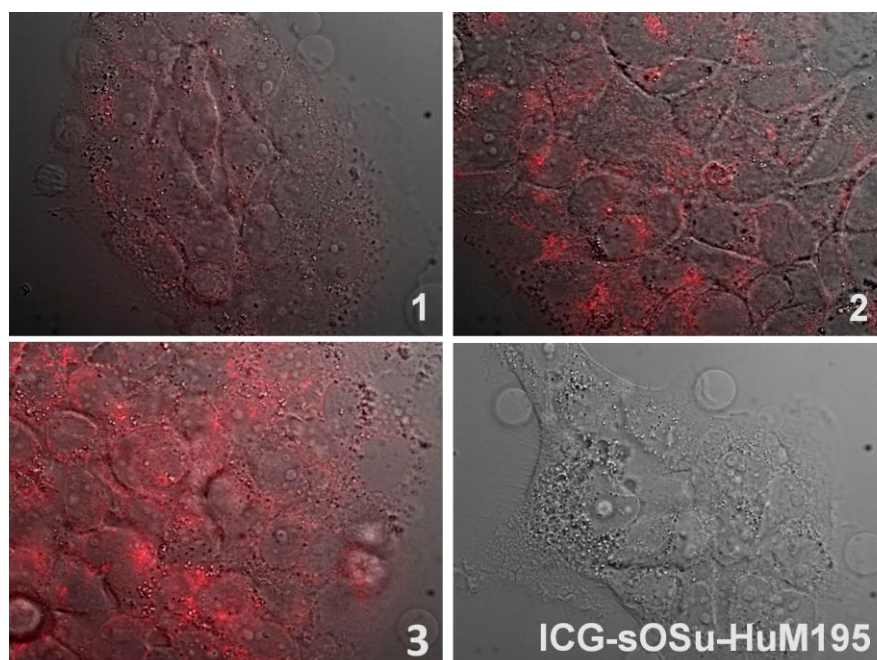

**Figure S3.** Representative fluorescence microscopy images, merged with DIC pictures, of SE-HPLC-purified ICG-sOSu-panitumumab (**1**, **2** and **3**) interacting with HER1-positive A431 cells. Cells were incubated with 2  $\mu\text{g}$  of each bioconjugate in 400  $\mu\text{L}$  culture media at 37  $^{\circ}\text{C}$  for 24 h. ICG-sOSu-HuM195 served as a negative control. Magnification: 63 $\times$ .

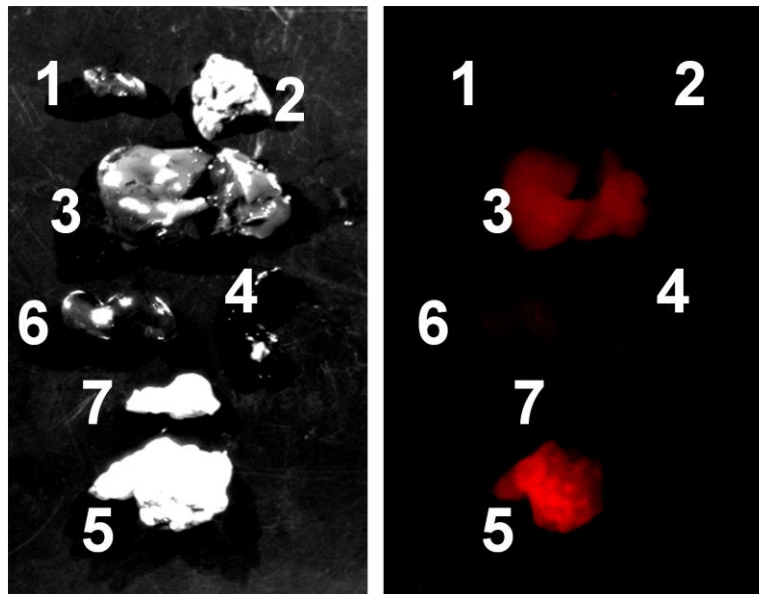

**Figure S4.** Representative *ex vivo* NIR fluorescence image (right) of the dissected organs from athymic mice bearing HER1-positive peritoneal LS-174T tumor xenografts at day 3 post-injection of ICG-sOSu-panitumumab (2, 20  $\mu$ g, i.v.). White light image (left) served as a reference. The highest fluorescence signal was shown in tumor followed by liver. Labels: 1: heart; 2: lung; 3: liver; 4: spleen; 5: tumor; 6: kidney; 7: Intestine.



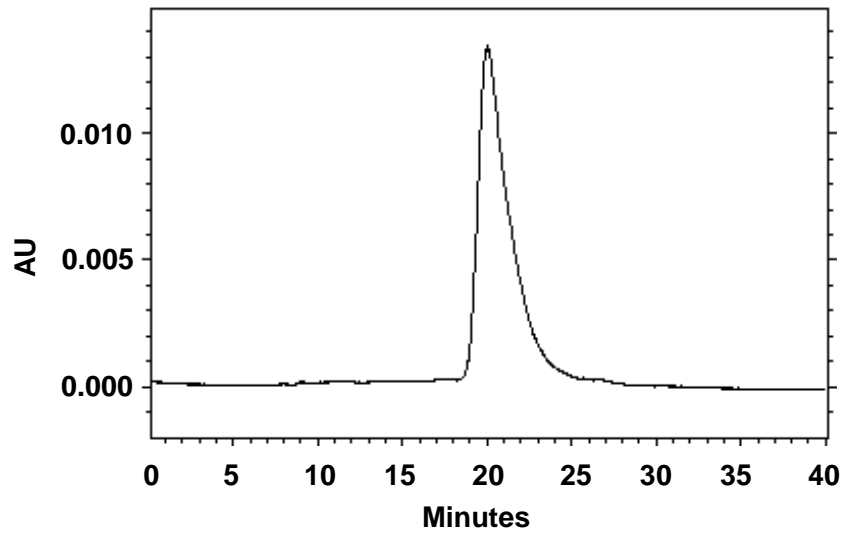

**Figure S5.** SE-HPLC profile of the doubly-purified ICG-sOSu-panitumumab (**5**).

## References

- [1] Milenic, D. E., Garmestani, K., Brady, E. D., Baidoo, K. E., Albert, P. S., Wong, K. J., Flynn, J., and Brechbiel, M. W. (2008) Multimodality therapy: potentiation of high linear energy transfer radiation with paclitaxel for the treatment of disseminated peritoneal disease. *Clin. Cancer Res.* 14, 5108-5115.
